# Supplementary material for: Strong chiroptical activity in Au25 clusters protected by mixed ligands of chiral phosphine and achiral thiolate
Source: Royal Society of Chemistry journal article supplement (doi:10.1039/d0cp02543g), 2020-01-01
Supplement: d0cp02543g1.pdf [file d0cp02543g1.pdf]

Electronic Supplementary Information (ESI) for *PCCP*

## Strong chiroptical activity in Au<sub>25</sub> clusters protected by mixed ligands of chiral phosphine and achiral thiolate

Takumi Nashimoto and Hiroshi Yao\*

*Division of Chemistry for Materials, Graduate School of Engineering, Mie University, 1577 Kurimamachiya-cho, Tsu, Mie 514-8507, Japan*

**Comparison of CD spectra between the obtained product [Au<sub>25</sub>(S-BINAP)<sub>4</sub>(DDT)<sub>5</sub>X<sub>4</sub>] and pure S-BINAP.**

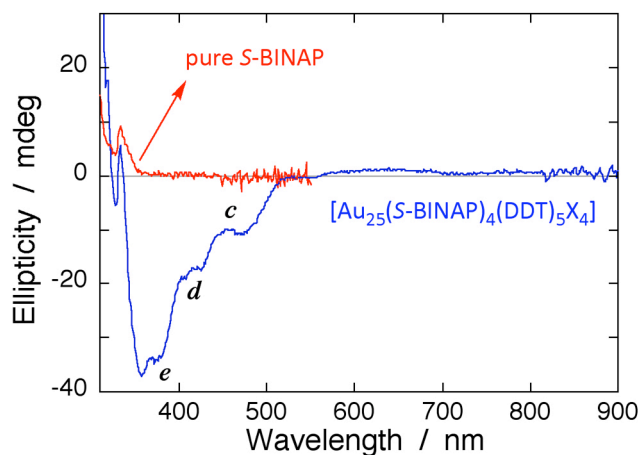

**Fig. S1.** CD spectra of the obtained Au<sub>25</sub> product [Au<sub>25</sub>(S-BINAP)<sub>4</sub>(DDT)<sub>5</sub>X<sub>4</sub>] and pure S-BINAP in DCM.

**Optimize structure and theoretical absorption/CD spectra of *trans*-form of Au<sub>25</sub> model cluster having (*S*)-1,4-diphosfinobuta-1,3-diene ligands instead of PH<sub>3</sub>.**

We also optimized *trans*-form of bi-icosahedral Au<sub>25</sub> cluster having (*S*)-1,4-diphosfinobuta-1,3-diene ligands instead of monodentate PH<sub>3</sub>, and on the basis of the structure, optical absorption and CD spectra were simulated (Fig. S2).

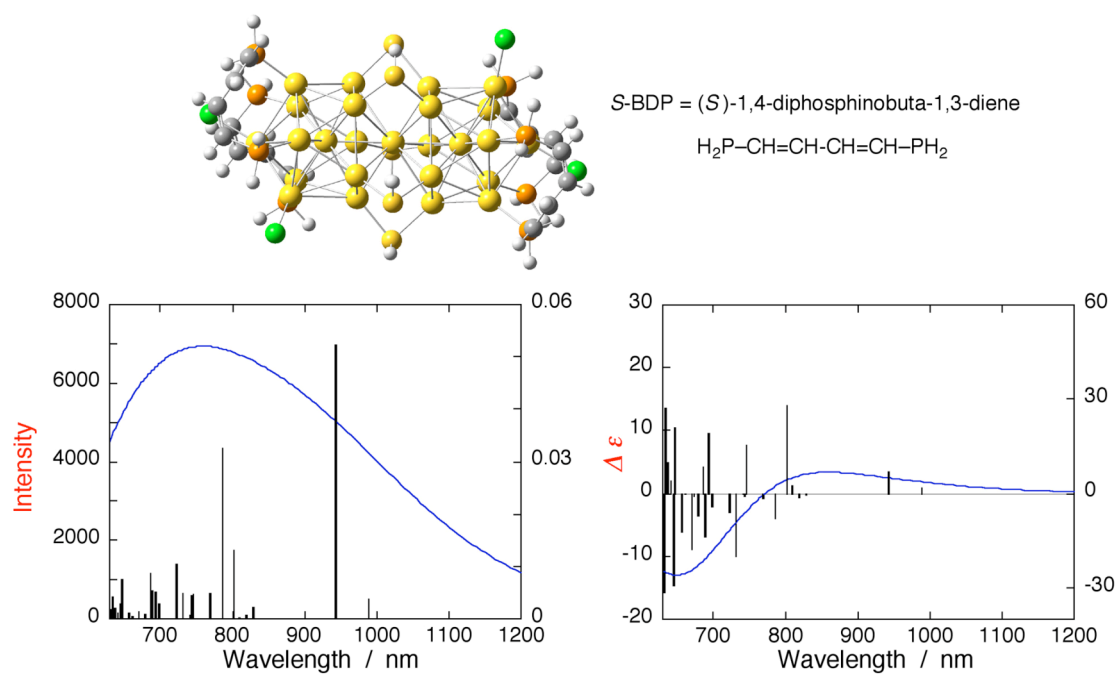

**Fig. S2.** Optimize structure (upper) and theoretical absorption/CD spectra (lower) of *trans*-form of  $\text{Au}_{25}$  model cluster having (*S*)-1,4-diphosfinobuta-1,3-diene ligands instead of monodentate  $\text{PH}_3$ .
